# Supplementary material
Source: PubMed Central journal article supplement (PMC7551217)
Supplement: jama-e2020717-s001.pdf [file jama-e2020717-s001.pdf]

## Supplemental Online Content

Bilinski AJ, Emanuel EJ. COVID-19 and excess all-cause mortality in the us and 18 comparison countries. *JAMA*. doi:10.1001/jama.2020.20717

Calculations in Tables 1 and 2

**eTable.** Data sources for all-cause mortality

This supplemental material has been provided by the authors to give readers additional information about their work.

# SUPPLEMENTAL INFORMATION

## COVID-19 and All-Cause Mortality in the US and 18 Comparison Countries

Alyssa Bilinski · Ezekiel Emanuel<sup>1,2</sup>

### CALCULATIONS IN TABLES 1 AND 2

#### Difference in deaths

Let  $r_i$  be the death rate of interest (reported COVID-19 deaths or excess all cause mortality) per 100,000 in country  $i$ , and  $d$  be US deaths over the period of study. Let  $p$  be the US 2019 population,  $p = 329,064,917$  according to the European Centre for Disease Prevention and Control. We estimate difference in deaths:

$$d - (r_i/100,000) * p \quad (1)$$

#### Difference in deaths if comparable after some time point

Letting  $r_{iT}$  be the death rate per 100,000 in country  $i$  between time  $T$  and the end of the period of study and  $d_T$  be US deaths by time  $T$ , we estimate potential difference in deaths since time  $T$ :

$$d - (d_T + (r_{iT}/100,000) * p) \quad (2)$$

### REGRESSIONS

#### Table 1

Let  $d_i$  be the number of deaths in country  $i$  over some time period, and  $p_i$  be its population. Assume we have countries  $j = 1, \dots, n$  and  $\mathbf{C}$  be a  $(n - 1) \times 1$  vector of country indicator variables with the US omitted as reference category. We assume that  $d_i \sim Pois(\lambda_i)$  and

$$\mathbb{E} [\log(\lambda_i)] = \beta_0 + \beta\mathbf{C} + \log(p_i), \quad (3)$$

where  $\beta$  is  $1 \times n - 1$  and  $\beta_j$  compares the death rate in country  $j$  to the US.

#### Table 2

Let  $d_{i,w,y}$  be the number of deaths in country  $i$  at week  $w$  in year  $y$ , and  $p_i$  be its population. Assume we have countries  $j = 1, \dots, n$  and  $\mathbf{C}$  be an  $(n - 1) \times 1$  vector of country indicator variables with the US omitted as reference category,  $\mathbf{W}$  be a  $(W - 1) \times 1$  vector of week indicator variables, and  $\mathbb{I}_{2020}$  be equal to 1 if the year is 2020 and 0 otherwise. We assume that  $d_{i,w,y} \sim Pois(\lambda_{i,w,y})$  and

$$\mathbb{E} [\log(\lambda_{i,w,y})] = \beta_0 + \beta\mathbf{C} + \gamma\mathbf{W} + \delta\mathbb{I}_{2020} + \alpha\mathbf{C}\mathbb{I}_{2020} + \log(p_i), \quad (4)$$

where  $\alpha$  is  $1 \times n - 1$  and  $\alpha_j$  compares excess 2020 mortality in country  $j$  to in the US.<sup>3</sup>

### DATA SOURCES

We accessed data on **COVID-19 deaths** from the **European Centre for Disease Prevention and Control COVID-19 database** ([link](#), accessed through R library [sars2pack](#)). We accessed **all-cause mortality data** from country-specific sources (Table S1). We also referenced *The Economist* ([link](#)) and *The New York Times* ([link](#)) excess death GitHubs and associated coverage.

<sup>1</sup>Contact: zemanuel@upenn.edu

<sup>2</sup>Data and code are available on GitHub ([link](#)).

<sup>3</sup>For estimation strategies, see Weinberger DM, Chen J, Cohen T, et al. Estimation of Excess Deaths Associated With the COVID-19 Pandemic in the United States, March to May 2020. *JAMA Intern Med.* Published online July 1, 2020. doi:10.1001/jamainternmed.2020.3391.

| Country        | Source                                                                                                             | File                                                                                                                                                                   | Included | Week format <sup>4</sup>                       | Notes                                                        | Link                                                               |
|----------------|--------------------------------------------------------------------------------------------------------------------|------------------------------------------------------------------------------------------------------------------------------------------------------------------------|----------|------------------------------------------------|--------------------------------------------------------------|--------------------------------------------------------------------|
| Australia      | Australian Bureau of Statistics                                                                                    | Provisional Mortality Statistics                                                                                                                                       | No       |                                                | Data only available through May 2020                         | <a href="#">link</a>                                               |
| Austria        | Statistics Austria                                                                                                 | Age-specific death rates in Austria (excl. deaths abroad) by calendar week                                                                                             | Yes      | Sunday-Saturday                                |                                                              | <a href="#">link</a>                                               |
| Belgium        | Statbel                                                                                                            | Number of deaths per day, sex, age, region, province, district                                                                                                         | Yes      | Daily data, aggregated by week (Monday-Sunday) |                                                              | <a href="#">link</a>                                               |
| Canada         | StatCan                                                                                                            | Adjusted number of deaths, expected number of deaths and estimates of excess mortality, by week                                                                        | Yes      | Monday-Sunday                                  |                                                              | <a href="#">link</a>                                               |
| Denmark        | Statistics Denmark                                                                                                 | DODC2: Deaths per week (experimental statistics) by region, sex and age                                                                                                | Yes      | Sunday-Saturday                                |                                                              | <a href="#">link</a>                                               |
| Finland        | Statistics Finland                                                                                                 | 12ng – Deaths by week according to sex, age and region (Rapid estimate), 1990W01-2020W37*                                                                              | Yes      | Sunday-Saturday                                |                                                              | <a href="#">link</a>                                               |
| France         | Insée                                                                                                              | Téléchargement des fichiers des décès quotidiens                                                                                                                       | Yes      | Sunday-Saturday                                | Economist used for all-cause mortality 2015-17               | <a href="#">link</a> , <a href="#">link</a>                        |
| Germany        | DeStatis                                                                                                           | Sterbefälle - Fallzahlen nach Tagen, Wochen, Monaten, Altersgruppen und Bundesländern für Deutschland 2016 - 2020                                                      | Yes      | Daily data, aggregated by week (Monday-Sunday) | Only available starting in 2016                              | <a href="#">link</a>                                               |
| Israel         | Ministry of Health                                                                                                 |                                                                                                                                                                        | Yes      | Sunday-Saturday                                | Received translation assistance                              | <a href="#">link</a>                                               |
| Italy          | Istat                                                                                                              | 10 August 2020 – Male, female and total deaths                                                                                                                         | No       |                                                | Data only available through June 2020                        | <a href="#">link</a>                                               |
| Japan          | e-Stat                                                                                                             | Current Population Survey / Vital Statistics                                                                                                                           | No       |                                                | Data only available through July 2, 2020                     | <a href="#">link</a>                                               |
| Netherlands    | StatLine                                                                                                           | Deaths registered weekly, by sex and age                                                                                                                               | Yes      | Sunday-Saturday                                |                                                              | <a href="#">link</a>                                               |
| Norway         | Statistics Norway                                                                                                  | 07995: Deaths, by sex, age and week. Preliminary figures 2000 - 2020                                                                                                   | Yes      | Sunday-Saturday                                |                                                              | <a href="#">link</a>                                               |
| South Korea    | Statistics Korea                                                                                                   | Vital statistics (births/deaths)                                                                                                                                       | No       |                                                | Received translation assistance; data only available monthly | <a href="#">link</a>                                               |
| Spain          | Instituto Nacional de Estadística                                                                                  | Estimate of Weekly Deaths                                                                                                                                              | Yes      | Sunday-Saturday                                |                                                              | <a href="#">link</a>                                               |
| Sweden         | Statistics Sweden                                                                                                  | Preliminary statistics on deaths in Sweden                                                                                                                             |          | Daily data, aggregated by week (Monday-Sunday) |                                                              | <a href="#">link</a>                                               |
| Switzerland    | Federal Statistics Office                                                                                          | Weekly number of deaths, 2020 & 2010-2019                                                                                                                              |          | Sunday-Saturday                                |                                                              | <a href="#">link</a>                                               |
| United Kingdom | Office of National Statistics (ONS), National Records of Scotland, Northern Ireland Statistics and Research Agency | Deaths registered weekly in England and Wales, provisional, Deaths involving coronavirus (COVID-19) in Scotland, Weekly death registrations in Northern Ireland, 2020. | Yes      | Sunday-Saturday                                |                                                              | <a href="#">link</a> , <a href="#">link</a> , <a href="#">link</a> |
| United States  | Centers for Disease Control and Prevention                                                                         | Deaths involving coronavirus disease 2019 (COVID-19), pneumonia, and influenza reported to NCHS by week ending date, United States. Week ending 2/1/2020 to 9/19/2020. | No       | Monday-Sunday                                  |                                                              | <a href="#">link</a>                                               |

Table S1 – Data sources for all-cause mortality. The "Included" column indicates whether available data met inclusion criteria; if not, this is explained in the "Notes" column. Due to differences in reporting, week definition varies slightly (either Monday-Sunday or Sunday-Saturday).
